# Supplementary material for: Cross-cultural adaptation and validation of the Romanian International Knee Documentation Committee—subjective knee form
Source: PeerJ. 2020 Feb 3;8:e8448. doi: 10.7717/peerj.8448 (PMC7003694; doi:10.7717/peerj.8448)
Supplement: Data S1 [file peerj-08-8448-s002.xlsx]

## Sheet: Sheet1
varsta	sex	Tegner	IKDC	Q1	Q2	Q3	Q4	Q5	Q6	Q7	Q8	Q91	Q92	Q93	Q94	Q95	Q96	Q97	Q98	Q99	Q102	KOOS	Index	VAS	Mi	Me	Cartilaj	ikdc2	q1	q2	q3	q4	q5	q6	q7	q8	q91	q92	q93	q94	q95	q96	q97	q98	q99	q102
54	1	80	47.1	1	10	4	3	3	1	4	3	3	3	2	2	2	3	1	1	3	5	7	0.837	80	3	0
47	0	60	26.4	1	10	8	0	1	0	1	1	1	1	1	1	2	2	0	0	2	3	11	0.35	50	3	0	4
72	0	57	3.4	0	10	10	0	0	0	0	0	0	0	0	0	0	0	0	0	0	3	15	0.381	70	4	1	4
69	0	33	16.1	1	10	8	2	1	1	1	1	0	0	0	0	2	1	0	0	0	2	20	0.169	50	3	0	4
70	1	26	26.4	1	7	7	2	1	0	1	1	1	1	0	0	2	2	0	0	0	7	14	0.562	70	3	1	3
62	0	29	14.9	0	9	9	3	0	1	2	0	0	0	0	0	0	1	0	0	1	3	15	0.531	70	3	0	4
61	0	51	18.4	1	10	5	2	1	0	1	1	0	0	0	0	2	1	0	0	0	2	23	0.169	40	3	0	4
	1	64	33.3	1	7	7	2	1	1	1	1	2	1	0	1	1	1	1	0	1	8	16	0.338	70	3	2	4
	0	65	21.8	1	10	10	0	4	1	2	2	3	0	4	0	0	0	0	0	0	4	17	0.516	50	3	0	2
38	0	38	9.2	0	10	9	2	0	0	1	0	1	1	1	0	0	1	0	0	0	0	17	-0.429	40	1	0	1
46	1	53	23	0	10	7	2	1	1	1	1	2	2	0	0	0	2	2	0	2	1	13	0.642	70	3	0	3
56	1	50	13.8	1	10	10	1	1	0	1	1	0	0	0	0	1	2	0	0	0	2	21	0.422	45	3	0	2
66	0	34	31	1	10	10	2	1	0	1	1	2	2	2	2	2	2	2	2	2	3	19	0.708		3	0	3
70	0	18	13.8	1	10	10	1	1	0	1	1	1	1	1	1	4	3	0	0	0	1	21	0.169	40	2	0	4
43	0	32	34.5	1	8	10	1	1	0	2	1	0	1	4	4	4	0	4	4	4	3		0.441	70	2	0	3
31	0	38	21.8	1	10	10	0	1	0	1	1	2	2	0	0	1	2	0	0	3	5	15	0.434	70	0	0	3
51	1	26	36.8	1	3	2	3	1	1	1	1	1	1	1	0	0	2	1	0	1	2	13	-0.071	40	4	0	4
54	0	26	23	1	10	10	0	1	0	1	0	1	1	0	1	1	2	1	1	1	8	18	0.516	60	4	0	2
52	1	61	52.9	1	5	3	3	1	1	3	3	3	1	3	3	3	3	1	3	3	2	12	1	80	4	0	2
66	1	41	32.2	1	10	7	3	1	1	1	1	1	2	1	1	1	2	0	0	2	7	11	0.555	90	4	0	3
55	0	26	20.7	1	9	8	1	1	1	1	1	1	1	0	0	0	1	0	0	1	5	19	0.274	30	4	1	3
45	1	59	42.5	2	5	6	2	2	0	2	1	2	1	1	1	1	2	2	1	1	6		0.567	50	4	3	4
49	0	42	28.7	0	6	6	1	1	0	1	2	1	1	1	1	1	1	1	1	2	2	16	0.48	50	3	0	3
63	1		39.1	1	8	5	1	1	1	1	1	2	2	2	3	2	2	1	1	1	5	11	0.375	50	3	1	1
42	0	44	27.6	0	10	5	1	0	0	0	0	2	2	3	3	2	3	1	1	2	2	7	0.735		3	0	3
66	0	9	18.4	0	9	9	1	1	1	1	1	1	1	0	0	0	0	0	0	0	5	20	-0.065	5	3	2	4
37	1	28	25.3	1	7	7	1	1	0	1	1	2	2	0	0	1	2	0	0	1	3	17	0.406	50	3	0
52	0	26	28.7	1	10	9	4	1	0	1	1	3	2	0	0	0	2	0	0	2	8	20	0.303	45	4	2	4
50	0	26	16.1	0	10	8	3	1	0	1	1	1	0	1	1	1	1	0	0	0	1	20	0.076	50	4	4	2
41	0	29	62.1	1	2	5	2	1	0	3	3	3	3	3	3	3	3	3	2	3	5	8	0.735	50	2	0	1
66	0	21	9.2	0	10	9	1	0	0	1	0	0	0	0	0	0	0	0	0	2	2	23	-0.08	35	4	1	3	11.5	1	10	9	1	1	0	1	1	0	0	0	1	1	1	0	0	2	0
45	0	44	18.4	0	9	8	2	0	0	0	0	1	1	1	1	1	1	1	0	1	3	20	0.555	50	4	0	1	33.3	1	8	8	2	1	1	1	1	2	2	1	1	2	2	1	1	1	5
43	1	33	50.4	1	4	4	2	1	0	1	1	3	3	3	3	3	3	2	1	2	6	13	0.767	95	2	0	2	51.7	1	6	6	3	1	0	1	1	3	3	3	3	3	3	2	2	2	6
48	1	80	67.8	2	4	2	3	2	1	2	2	3	3	3	3	4	4	3	3	4	5	7	1	95	3	1	2	74.7	2	4	4	3	2	1	2	2	3	3	3	3	3	4	4	4	4	9
61	0	33	32.2	1	7	8	1	1	0	1	1	2	2	1	1	1	2	1	0	2	5	19	0.206	60	4	1	2	35.6	1	7	8	1	1	0	1	1	2	2	1	1	2	2	1	1	2	7
65	0	29	23	1	10	10	1	1	1	4	0	1	1	1	1	1	2	0	0	2	2	19	0.343	40	4	1	1	14.9	1	10	10	1	1	1	1	0	1	1	1	0	0	2	0	0	1	0
59	1	24	4.6	0	10	10	3	0	0	0	0	0	0	0	0	0	1	0	0	0	0	14	0.429	90	4	4	3
59	1	52	56.3	1	5	5	3	1	1	1	1	3	3	3	2	2	3	2	2	3	8	13	0.837	95	3	0	2
46	0	69	42.5	1	6	8	4	1	1	4	2	2	1	1	1	1	1	3	3	4	6	14	0.664	60	3	1	2	51.7	1	6	9	3	1	1	1	1	2	3	2	1	1	2	2	3	3	5
48	0	73	27.6	1	9	9	1	1	0	1	1	1	1	0	0	2	2	1	0	1	9	19	0.449	50	2	0	2
83	0	28	39.1	1	10	7	2	1	0	1	1	2	3	2	2	4	2	3	4	3	0	16	0.567	50	4	2	2
52	1	19	42.5	3	10	8	1	0	1	0	0	1	1	4	4	3	2	4	4	2	6	17	0.429	50	4	1	3	39.1	1	10	4	2	1	0	1	1	1	1	0	0	2	2	3	4	3	6
54	0	65	58.6	2	5	5	1	1	0	1	2	3	3	3	3	3	2	4	3	4	4	7	0.795	50	4	1	1
34	0	57	39.1	1	8	8	2	1	0	1	1	2	2	2	2	2	2	1	0	3	8	16	0.723	90	4	1	4
58	1	40	19.5	1	10	7	1	1	0	1	1	1	2	1	0	2	1	0	0	0	2	18	0.624	75	3	1	1	20.7	1	10	7	1	1	0	1	1	2	2	1	0	2	1	0	0	0	2
73	0	23	21.8	1	8	8	1	1	0	1	1	0	2	0	0	0	2	0	0	1	5	23	0.531	50	3	4	3	21.8	1	8	8	1	1	0	1	1	0	2	0	0	0	2	0	0	1	5
51	0	62	28.7	2	9	9	2	2	0	2	2	0	0	0	0	0	0	2	1	1	9	22	0.516	50	2	1	3	28.7	2	9	9	2	2	1	2	2	0	0	0	0	0	0	1	1	1	9
54	0	23	25.3	0	10	10	1	0	0	0	1	1	3	3	1	4	3	1	1	1	2	16	-0.113	50				28.7	1	8	8	1	1	1	1	0	1	3	1	1	3	3	1	1	1	1
41	1	53	34.5	1	10	8	4	1	0	1	1	2	2	2	1	1	1	1	1	1	8	18	0.612	50	3	1	1
42	0	77	20.7	1	10	8	2	1	0	1	1	1	0	0	0	1	2	0	0	2	3	15	0.619	80	4	0	2	19.5	1	10	8	2	1	0	1	1	1	0	0	0	1	2	0	0	2	3
47	0	69	34.5	0	8	6	2	1	0	1	1	1	2	3	1	1	1	2	3	2	2	16	0.094	50	4	1	1	41.4	1	8	8	2	1	0	1	1	3	2	2	4	3	2	2	3	2	3
58	0	74	58.6	1	7	5	3	1	1	1	1	3	3	2	2	4	4	4	2	4	7	5	0.778	80	4	1	1		1	8	4	3	1	1	1	1	3	3	2	2	2	4	3	2	4	5
36	1	71	47.1	3	4	4	2	3	0	3	3	1	1	2	2	2	1	1	1	1	3	7	0.837	80	4	0	2	62.1	3	3	5	4	4	0	4	2	2	4	2	2	2	2	2	1	3	5
59	1	56	48.3	1	10	6	3	1	1	1	1	2	2	4	4	4	3	1	2	2	6	13	0.531	60	4	1	1	44.8	1	6	5	3	1	1	4	1	2	2	3	3	3	2	0	0	1	3
47	0	49	14.9	0	10	9	1	0	1	1	0	0	0	0	0	0	0	0	0	0	9	14	0.345	50	3	4	4	4.6	1	10	10	1	1	0	1	0	0	0	0	0	0	0	0	0	0	0
36	0	64	41.4	2	8	6	2	1	1	2	1	2	1	1	0	2	3	3	3	3	3	10	0.736	90	2	1	3	48.3	1	6	5	2	1	1	2	1	3	2	1	1	2	2	3	3	3	5
54	0	51	24.1	2	10	8	2	2	0	3	3	1	1	0	0	0	2	1	0	2	0	15	0.263	50	4	1	4	34.5	2	10	8	2	1	1	1	2	2	2	0	0	0	3	2	0	2	8
70	0	62	49.4	1	10	2	4	1	1	1	1	3	3	1	0	3	3	1	1	2	9	18	0.837	90	4	2	4
64	0	19	26.4	1	10	7	3	1	0	1	1	2	2	0	0	1	1	0	0	0	7	21	0.378	45	4	1	3
43	0	64	17.2	0	10	7	0	1	1	1	1	0	0	0	0	1	2	2	0	2	1	16	0.242	70	2	0	4
40	1	42	32.2	2	8	4	3	1	0	0	1	2	2	1	1	2	1	0	0	0	4	17	0.648	85	2	0	2	32.2	2	8	4	3	1	0	0	1	2	2	1	1	2	1	0	0	0	4
76	0	27	43.7	1	10	10	1	1	0	1	1	1	1	0	4	3	2	4	4	4	10	19	0.074	80	4	2	3	49.4	1	10	10	1	1	0	1	1	0	1	4	4	4	3	4	4	4	10
63	0	79	58.6	1	5	10	3	1	1	3	2	3	2	4	4	4	4	3	4	3	5	10	0.691	70	1	3	2	67.8	1	5	4	3	2	1	2	2	3	3	4	4	4	4	3	4	3	5
58	0	54	25.3	1	10	10	2	1	1	1	1	1	1	0	1	0	1	0	0	1	10	26	0.837	50	4	1	4	25.3	1	10	10	2	1	1	1	1	1	1	0	1	0	1	0	0	1	10
69	0	41	26.4	0	8	9	1	1	0	2	1	1	1	0	0	1	2	0	0	2	8	18	0.689	30	4	2	4
59	1	41	40.2	1	4	9	3	1	0	1	1	0	0	0	0	4	3	1	1	2	10	17	0.535	100				41.4	1	4	8	3	3	0	1	1	0	0	0	0	4	3	0	0	2	10
66	0	44	43.7	3	10	7	0	1	1	4	3	1	3	0	0	3	3	0	1	2	10	17	0.415	95	4	1	4	43.7	3	10	7	0	1	1	4	3	1	3	0	0	3	3	0	1	2	10
58	0	53	39.1	1	5	5	4	2	1	1	1	2	2	0	0	1	0	2	0	0	7	20	0.533	50	2	0	3	26.4
51	0	31	25.3	1	8	9	1	1	1	1	1	2	2	1	0	2	2	0	0	3	1	19	0.678	40	4	1	3		0	10	10	1	1	0	2	1	2	2	1	1	3	3	1	1	2	2
47	0	50	34.5	1	6	5	2	1	0	1	1	1	1	0	0	2	2	0	0	1	8	15	0.635	60	4	1	4	25.3	1	7	8	2	0	0	1	1	1	1	1	1	1	2	0	0	0	5
78	0	35	14.9	1	10	10	1	1	0	1	1	1	1	1	1	1	2	1	0	0	0	18	0.429	70	4	2	4	19.5	1	10	10	1	1	0	1	1	1	1	1	1	1	2	1	0	0	4
53	0	63	14.9	1	10	9	0	1	0	1	1	0	0	0	1	2	1	0	0	0	4		0.238	55	4	1	1	13.8	1	10	9	1	1	0	1	1	0	0	0	0	1	1	0	0	0	4
47	0	47	33.3	1	8	4	1	1	1	1	1	2	1	1	1	2	2	1	1	2	2	18	0.642	70	2	0	2	36.8	1	7	5	2	1	1	1	1	2	1	1	2	2	2	1	1	2	3
53	0	90	57.5	4	3	3	2	3	0	3	3	2	2	0	0	3	3	3	0	3	6	10	0.728	80	4	1	2	58.6	3	3	3	2	3	0	3	2	2	2	2	1	3	3	3	1	3	4
73	1	83	33.3	1	8	8	3	1	1	1	1	2	2	1	1	1	1	2	0	2	5	15	0.723	90	4	1	3	34.5	1	8	8	3	1	1	1	1	2	2	1	0	1	2	0	0	2	8
33	1	54	41.4	1	6	6	3	2	0	1	0	3	2	1	1	1	3	3	1	2	4	12	0.522	90	3	0	1	41.4	1	5	6	3	1	0	2	1	3	2	1	1	1	3	3	1	2	2
44	0	80	44.8	2	6	8	1	2	1	2	2	2	2	1	1	1	3	3	2	3	5	9	0.642	90	1	0	4	44.8	2	6	8	1	2	1	2	2	2	2	1	1	1	3	3	2	3	5
34	1	89	64.4	1	3	3	0	1	1	1	1	4	4	4	4	4	4	3	0	0	10	0	0.906	100	1	0	2	70.1	1	2	0	1	1	1	1	1	4	4	4	4	4	4	1	1	1	10
59	0	25	24.1	1	7	7	1	1	0	1	1	1	1	1	0	1	2	0	0	0	4	18	0.516	70	4	1	4	56.3
	0	54	56.3	1	5	5	2	1	1	1	1	3	3	4	4	3	2	4	4	4	5	15	0.516	50
																									1	0	2	46	2	5	5	4	2	1	2	2	2	2	1	1	2	1	2	0	1	5
60	0	29	8	0	10	10	1	0	1	0	0	0	0	0	0	0	1	0	0	0	4	26	0.282	65	4	1	3	13.8	0	10	8	1	1	0	0	0	1	0	0	0	1	2	0	0	0	5
50	0	47	29.9	1	9	6	3	2	0	1	1	0	0	0	1	1	1	0	0	1	9	17	0.55	90	4	1	4
42	1	80	52.9	1	5	5	2	1	1	1	1	3	3	3	2	2	3	3	2	3	5	8	0.735		4	0	2		2	5	5	2	2	1	2	1	3	3	2	2	2	3	3	2	3	5
50	0	53	23	2	8	10	0	0	0	2	2	1	0	0	0	0	1	0	0	1	9	20	0.627	60	1	0	4
38	1	52	44.8	1	7	7	2	1	0	1	1	1	1	0	0	2	2	4	4	3	10	17	0.584		3	0	2	19.5	1	7	7	2	1	0	1	1	1	1	1	0	0	2	0	0	0	0
52	0	55	33.3	1	7	7	3	1	1	1	1	2	1	0	0	3	3	0	0	2	4	17	0.62	60	4	1	4	56.3	1	4	5	3	1	1	1	1	3	2	0	4	4	2	3	4	4	4
52	0	34	24.1	0	10	8	2	1	0	1	1	1	1	1	2	2	1	2	0	1	3	20	0.555	70	4	0	1
39	1	41	55.2																			15	0.693	90
73	1	55	26.4	0	10	9	2	1	1	4	1	0	0	0	0	2	1	0	0	2	9	18	0.057	50	4	1	3	17.2	1	10	9	1	1	1	2	1	0	0	0	1	3	2	0	0	0	1
44	0	34	21.8	1	8	9	2	1	0	1	1	0	0	1	1	1	2	1	1	1	2	18	0.479	40	3	0	3	23	1	8	8	3	1	0	1	1	0	0	0	0	3	2	0	0	3	1
33	1	66	50.6	3	8	5	4	1	1	3	4	1	3	2	0	1	2	4	1	1	6	7	0.71	90	1	0	2	57.5	3	5	5	4	1	1	3	4	1	3	1	1	1	3	4	2	3	5
57	0	24	32.2	1	9	8	2	1	0	1	1	1	3	0	1	0	2	1	0	1	3		0.531	50	4	1	2	35.6	1	9	7	2	3	0	1	1	1	3	0	1	0	2	1	0	1	3
47	1	65	57.5	1	4	5	1	2	0	1	1	2	2	3	2	2	4	4	4	3	9	11	0.678	70	3	0	1	54	1	4	4	3	1	1	2	1	3	2	3	3	3	3	1	1	2	5
61	0	22																							4	1	4	47.1	1	10	10	2	1	0	1	1	1	2	4	4	4	3	4	4	4	5
64	1	50																							3	1	3	18.4	0	10	7	0	0	1	0	1	2	1	0	0	0	1	1	0	0	6
51	1	64																							3	0	1	49.4	2	5	5	2	2	1	2	2	3	2	1	2	3	3	2	1	2	3
33	1	48	37.9	1	5	7	2	1	0	1	1	4	3	2	1	1	2	0	0	1	5	9	0.837	85	3	0	3	57.5	1	4	7	2	1	0	1	1	4	4	3	3	3	4	2	2	2	8
45	1	63	51.7	2	7	4	4	2	1	2	2	3	3	2	1	1	3	1	1	2	7	13	0.735	100				50.6	1	5	5	4	2	1	2	2	3	3	2	1	1	3	1	1	2	6
64	1	35	23	1	7	6	1	1	0	1	1	1	1	0	0	0	1	1	0	0	4	16	0.587	70	4	1	3	24.1	1	7	6	1	1	0	1	2	1	1	0	0	0	0	0	0	0	6
37	0	36	39.1	1	5	5	1	1	0	1	1	2	2	2	2	1	1	1	1	2	5	12	0.819	90	3	0	2	50.6	1	5	3	2	1	0	2	2	2	2	2	2	2	2	2	1	1	8
44	1	32	26.4	1	10	8	1	1	0	1	1	2	2	0	0	0	2	0	0	1	9	21	0.097	65	3	1	3	29.9	1	8	8	1	3	0	1	1	2	2	0	0	0	2	2	0	2	8
60	1	59	28.7	1	10	8	2	1	1	0	0	2	2	1	1	1	2	1	0	2	6	12	0.648	95	4	1	3	27.6	1	10	8	2	0	1	0	0	2	2	1	1	1	2	1	0	1	6
50	0	9	11.5	1	9	8	1	1	0	1	1	0	0	0	0	0	1	0	0	0	1	27	0.036	15	4	0	2
37	0	86	74.7	2	4	4	3	2	1	2	2	4	3	3	4	3	4	4	4	4	8			70
56	1	47	20.7	0	6	6	4	1	0	0	0	1	1	0	0	0	2	0	0	0	1			55
36	1	73	56.3	1	5	5	1	1	1	1	1	3	4	3	3	3	4	3	2	2	7			90
26	1	27	62.1	2	4	3	2	1	0	2	2	3	4	2	2	2	4	3	2	3	7			60
27	0	76	55.2	2	6	9	4	2	1	1	2	1	4	2	4	3	3	1	2	3	8			90
21	1	54	46	1	2	2	3	1	1	1	1	2	2	1	1	2	3	0	2	2	1			30
